# Supplementary material for: Genome-wide screen identifies a novel prognostic signature for breast cancer survival
Source: PubMed Central journal article supplement (PMC5355157; doi:10.18632/oncotarget.14776), 2017-01-21
Supplement: oncotarget-08-14003-s001.pdf [file oncotarget-08-14003-s001.pdf]

## **Genome-wide screen identifies a novel prognostic signature for breast cancer survival**

### **SUPPLEMENTARY TABLES**

**Supplementary Table 1: Differential gene expression between breast tumor and normal breast tissue**

See Supplementary File 1

**Supplementary Table 2: The 795 probe IDs robustly deregulated in breast cancer**

See Supplementary File 2

**Supplementary Table 3: Genes significantly associated with relapse-free survival in breast cancer patients**

See Supplementary File 3

**Supplementary Table 4: Significant GO categories associated with 381 genes significantly associated with relapse-free survival in breast cancer**

See Supplementary File 4
